1     **Neuronal adenosine A<sub>2A</sub> receptors signal ergogenic effects of**  
2                                           **caffeine**

3

4     Aderbal S Aguiar Jr<sup>1,2\*</sup>, Ana Elisa Speck<sup>1,2</sup>, Paula M. Canas<sup>1</sup>, Rodrigo A.  
5     Cunha<sup>1,3</sup>

6

7     <sup>1</sup>Purines at CNC-Center for Neuroscience and Cell Biology, University of  
8     Coimbra, 3004-517 Coimbra, Portugal; <sup>2</sup>Research Group on Biology of  
9     Exercise, Department of Health Sciences, UFSC-Federal University of Santa  
10    Catarina, Araranguá, SC, Brazil 88905-120; <sup>3</sup>FMUC – Faculty of Medicine,  
11    University of Coimbra, 3004-504 Coimbra, Portugal

12

13    \* Corresponding author: Prof. Aderbal S Aguiar Jr, Universidade Federal de  
14    Santa Catarina – UFSC, Departamento de Ciências da Saúde, 88905-120,  
15    Araranguá – SC, Brazil. Tel.: +55 (48) 37214743. E-mail:  
16    [aderbal.aguiar@ufsc.br](mailto:aderbal.aguiar@ufsc.br), [aderbalaquiar@gmail.com](mailto:aderbalaquiar@gmail.com)

17

1 **Acknowledgements**

2 The work was supported by Prémio Maratona da Saúde, CAPES-FCT  
3 (039/2014), FCT (PTDC/NEU-NMC/4154) and ERDF through Centro 2020  
4 (project CENTRO-01-0145-FEDER-000008:BrainHealth 2020). A.S.A.Jr is a  
5 CNPq fellow. We would like to acknowledge Flávio N. F. Reis and Frederico C.  
6 Pereira (IBILI - Institute for Biomedical Imaging and Life Sciences, University of  
7 Coimbra) for making available the treadmill and gas analyzer.

8

9 **Contributions**

10 A.S.A.Jr designed and performed the experiments, prepared the figures, and  
11 wrote the manuscript. A.E.S performed the experiments. P.M.C. designed the  
12 experiments and wrote the manuscript. R.A.C. designed the experiments and  
13 wrote the manuscript. All authors revised the manuscript.

14

15 **Competing Interests**

16 The authors declare no conflict of interest.

17

1 **Abstract**

2 Ergogenic aid is a substance or method used for enhancing exercise and sports  
3 performance. Caffeine is the most used ergogenic aid for athletes, but the  
4 mechanisms are still unknown. Forty-two adult female (19±0.6 g) and 40 male  
5 mice (24±0.4 g) from a global and forebrain A<sub>2A</sub>R knockout and colony (FMUC,  
6 University of Coimbra) underwent an open field and ergospirometry exercise  
7 test. Caffeine (15 mg/kg, i.p.) and SCH 58261 (1 mg/kg, i.p.) were administered  
8 15 minutes before the animals ran to exhaustion. We also evaluate the estrous  
9 cycle and infrared temperature (rest and recovery). Caffeine was  
10 psychostimulant in wild type females and males, but we observed this expected  
11 effect of SCH-58261 only in males. Caffeine and SCH-58261 were also  
12 ergogenic for wild type animals, that is, they increased running power and  
13 maximal O<sub>2</sub> consumption ( $\dot{V}O_{2max}$ ). The psychostimulant and ergogenic effects  
14 of caffeine and SCH-58261 disappeared in A<sub>2A</sub>R knockout females (global) and  
15 males (forebrain). The estrous cycle did not influence any evaluated  
16 parameters, as well as exercise-induced hyperthermia was similar between  
17 savages and knockouts. Our results suggest that the neuronal A<sub>2A</sub>R receptors  
18 signal the ergogenic effects of caffeine in female and male mice.

19 **Keywords:** Caffeine; Ergogenic; Fatigue; Oxygen consumption; SCH-58261.

20

## 1 INTRODUCTION

2 Caffeine is the most used ergogenic substance for athletes. Caffeine spike  
3 exercise performance in rodents<sup>1-5</sup> and humans<sup>6-8</sup>. It increases endurance in  
4 submaximal cycling in humans<sup>6-8</sup> and on the treadmill in rodents<sup>1-5</sup>. Candidate  
5 mechanisms are controversial due to *in vivo* toxicity, such as blocking GABA<sub>A</sub>  
6 receptors, inhibition of phosphodiesterase and increased calcium mobilization  
7 achieved with millimolar concentrations of caffeine<sup>9-10</sup>. This is the evidence used  
8 by the sports sciences. However, adenosine receptors have a high caffeine  
9 affinity for caffeine<sup>9-10</sup>. We hypothesized that adenosine A<sub>2A</sub> receptors (A<sub>2A</sub>R)  
10 are essential for the ergogenic effects of caffeine, and evaluated its effects in an  
11 exercise test.

12

## 13 RESULTS

### 14 Caffeine and SCH-58261 are not ergogenic in global A<sub>2A</sub>R knockouts

15 Ergospirometry evaluates exercise submaximal and maximal performance  
16 during ergometer exercise (power, O<sub>2</sub> and CO<sub>2</sub> kinetics) and exclude subjective  
17 measures of fatigue<sup>1,3,11</sup>. The test assessed the ergogenic effects of Caffeine  
18 and SCH-58261 (a potent and selective A<sub>2A</sub>R antagonist) and A<sub>2A</sub>R knockout  
19 (KO) mice. We used females in the first set of experiments, due to the  
20 characteristic of our animal colony. There is no impairment in the use of females  
21 for performance evaluation<sup>1</sup>. In the open field, the basal motor behavior was not  
22 different between wildtype (WT) and A<sub>2A</sub>R KO ( $t_{18} = 0.8$ , Fig.1A). SCH-58261  
23 did not modify the locomotion ( $t_{18} = 0.4$ , Fig.1A), and caffeine was  
24 psychostimulant for WT animals, but not for A<sub>2A</sub>R KO mice ( $F_{1,36} = 5.8$ ,  $P <$   
25 0.05, Fig.1A).

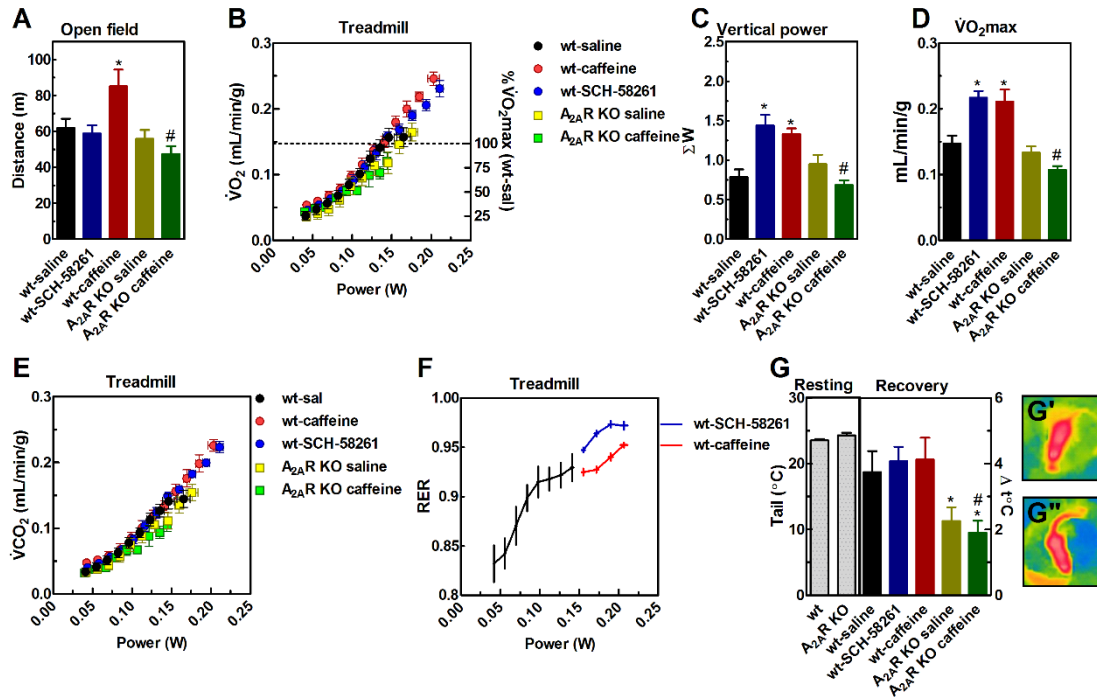

1

2 Ergospirometry increased running power ( $F_{7,210} = 6243$ ,  $P < 0.05$ , Fig.1B)

3 and  $O_2$  consumption ( $\dot{V}O_2$ ,  $F_{7,196} = 255$ ,  $P < 0.05$ , Fig.1B) in a gradual manner,

4 without submaximal  $\dot{V}O_2$  differences at speeds  $15 \rightarrow 50$  cm/s (SCH-58261  $F_{7,77}$

5 = 0.8; caffeine  $\times$  A<sub>2A</sub>R KO  $F_{7,133} = 2.1$ ). These speeds ( $15 \rightarrow 50$  cm/s)

6 correspond to exercise test stages fulfilled by all groups, and also the maximal

7  $O_2$  uptake ( $\dot{V}O_{2max}$ ) of WT controls (wt-saline, Fig.1B – dotted line indicating

8 100%). High-performance speeds ( $55 \rightarrow 65$  cm/s) were mainly reached by WT

9 animals treated with SCH-58261 or caffeine, reflecting the ergogenic profile of

10 A<sub>2A</sub>R antagonists.

11 We demonstrated for the first time that SCH-58261 was ergogenic, that

12 is, it increase running power ( $t_{16} = 2.1$ ,  $P < 0.05$ , Fig.1D) and  $\dot{V}O_{2max}$  ( $t_{16} = 3.3$ ,

13  $P < 0.05$ , Fig.1D) of WT females. The ergogenic effects of caffeine were

14 demonstrated in rodents<sup>2-6</sup>. These effects were reproduced in our Lab by

15 demonstrating increased running power ( $F_{1,32} = 21$ ,  $P < 0.05$ , Fig.1C) and

1  $\dot{V}O_2\text{max}$  ( $F_{1,32} = 11$ ,  $P < 0.05$ , Fig.1D). According to hypothesis, caffeine was  
2 not ergogenic for  $A_{2A}R$  KO mice; caffeine unchanged running power ( $F_{1,32} = 21$ ,  
3  $P < 0.05$ , Fig.1C) and  $\dot{V}O_2\text{max}$  ( $F_{1,32} = 11$ ,  $P < 0.05$ , Fig.1D).

4 Ergospirometry also evaluates substrate utilization during exercise  
5 through respiratory-exchange ratio ( $RER = \dot{V}CO_2/\dot{V}O_2$ ).  $CO_2$  production ( $\dot{V}CO_2$ )  
6 had similar kinetics to  $\dot{V}O_2$  during the exercise test at speeds  $15 \rightarrow 50$  cm/s  
7 ( $F_{7,210} = 257$ ,  $P < 0.05$ , Fig.1E). RER increased during exercise ( $F_{1,189} = 15.8$ ,  $P$   
8  $< 0.05$ , Fig.1F) at these speeds, without any effect of SCH-58261 ( $F_{7,77} = 0.8$ ) or  
9 caffeine  $\times$  genotype ( $F_{7,133} = 1.2$ ).

10 Exercise and substrate oxidation produce heat; we have described tail  
11 hyperthermia as an index of exercise-induced thermoregulation<sup>1</sup>. That away, 3  
12 females at estrous (Fig.S1C) were excluded due to large exercise-induced tail  
13 hyperthermia at this stage of estrous cycle<sup>1</sup>. The following results refer to  
14 females in diestrus (Fig.S1A), proestrus (Fig.S1B) and metestrus (Fig.S1D). Tail  
15 resting IR temperature was similar among wildtype and  $A_{2A}R$  KO mice ( $t_{34} = 3.4$ ,  
16 Fig.1G). The Fig.1G' shows the IR profile of female tails at rest, and the tail  
17 heating (candle effect) caused by high-intensity exercise (Fig.1G''). Tail  
18 temperature increased approximately  $4 \pm 0.3^\circ C$  for WT and  $2.1 \pm 0.3^\circ C$  for  $A_{2A}R$   
19 KO mice, with a significant effect of genotype factor ( $F_{1,27} = 15$ ,  $P < 0.05$ ,  
20 Fig.1G). There were no significant effects of SCH-58261 ( $t_{16} = 0.5$ , Fig.1G) or  
21 caffeine ( $F_{1,27} = 1.6$ , Fig.1G) on exercise-induced tail heating.

### A Diestrus

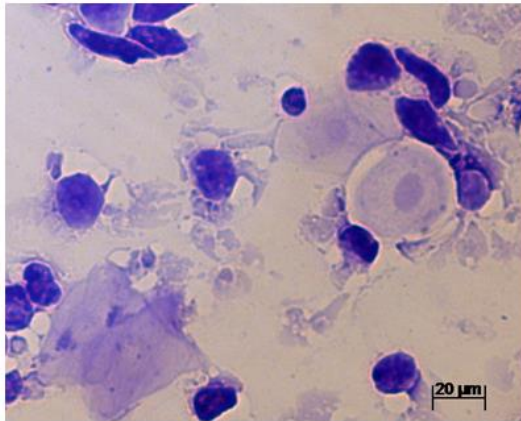

### B Proestrus

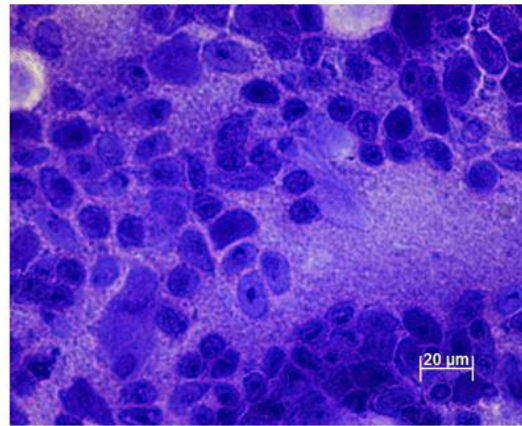

### C Estrus

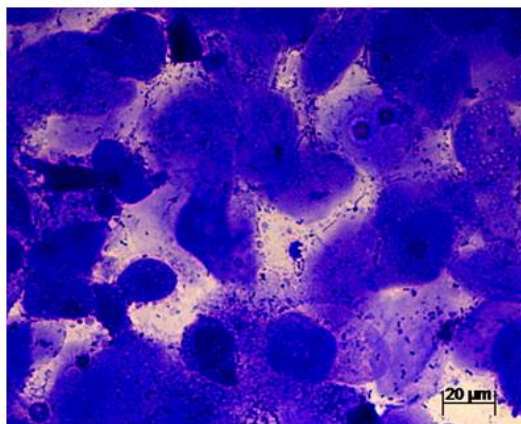

### D Metestrus

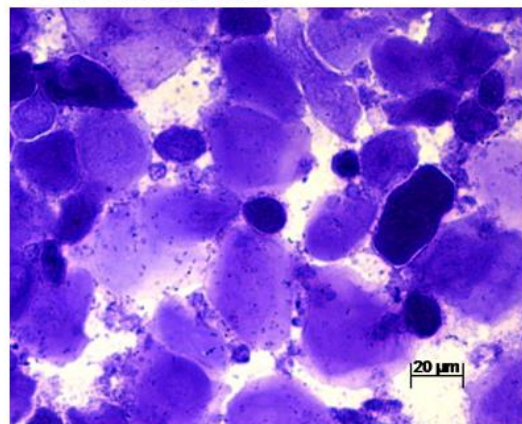

1

2 **The ergogenic effects of caffeine and SCH-58261 depend on neuronal**

3 **A<sub>2A</sub>R receptors**

4 These results suggest the robust role of A<sub>2A</sub>R in the ergogenic effects of  
5 caffeine. We use forebrain neuron-specific A<sub>2A</sub>R KO mice (fb-A<sub>2A</sub>R KO) to  
6 understand whether the role of A<sub>2A</sub>R is cell-type specific. ‘Floxed’ A<sub>2A</sub>R mice  
7 were crossed with calmodulin-dependent protein kinase II  $\alpha$  subunit (CaMKII $\alpha$ )-  
8 Cre transgenic line<sup>7</sup>. This experiment was carried out with males, again due to  
9 the characteristics of our animal colony.

10 SCH-58261 ( $t_{21} = 2.3$ ,  $P < 0.05$ , Fig.2A) and caffeine ( $F_{1,34} = 8.6$ ,  $P <$   
11  $0.05$ , Fig.2A) were psychostimulants for WT mice in the open field. But caffeine

1 did not change the locomotion of fb-A<sub>2A</sub>R KO mice. There were no submaximal  
 2 differences in ergospirometry for speeds 15 → 55 cm/s (Fig.2B-F). Fig.2C-D  
 3 shows the ergogenic effect of SCH-58261 on running power ( $t_{16} = 3.3$ ,  $P < 0.05$ )  
 4 and  $\dot{V}O_{2max}$  ( $t_{16} = 2.1$ ,  $P < 0.05$ ) in WT mice, as did caffeine (Power  $F_{1,26} =$   
 5 10.7;  $\dot{V}O_{2max}$   $F_{1,30} = 5.0$ ). Caffeine was no longer ergogenic in fb-A<sub>2A</sub>R KO  
 6 mice.

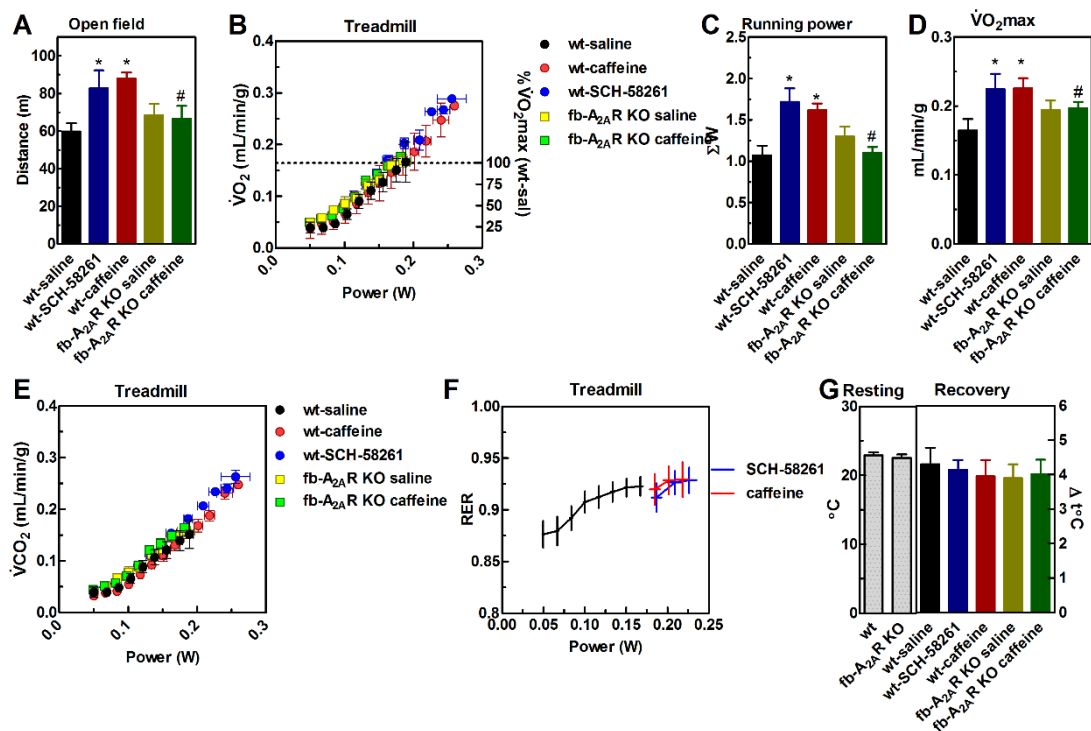

7

8 Then we see no differences in RER (Fig.2F) and tail temperature  
 9 (Fig.2G). SCH-58261 ( $F_{1,56} = 0.3$ ) and caffeine  $\times$  genotype ( $F_{1,98} = 0.2$ )  
 10 unchanged RER (Fig.2F). Tail temperature was similar at rest ( $t_{30} = 0.5$ ) and  
 11 after maximal exercise ( $F_{1,26} = 0.07$ ) for all groups.

12



## 1 DISCUSSION

2 Caffeine increases exercise performance in rodents<sup>1-5</sup> and humans<sup>6-8</sup>. Early  
3 evidence demonstrated metabolic changes during exercise, through  
4 glycolysis/glycogenolysis inhibition (and glycogen economy) by increasing fat  
5 oxidation (and increased RER and thermogenesis)<sup>6-7</sup>. Authors speculated on  
6 the phosphodiesterase inhibition and calcium mobilization evidence<sup>9-10</sup>. But  
7 there is a serious lack of support for all these metabolic changes<sup>4,13-17</sup>.  
8 Increased fat oxidation should decrease RER. However, we did not observe  
9 submaximal differences in ergospirometry ( $\dot{V}O_2$ ,  $\dot{V}CO_2$ , and RER), only in peak  
10 exercise performance (power and  $\dot{V}O_{2max}$ ) in SCH-58261 and caffeine-treated  
11 WT animals. These effects were shown to be  $A_{2A}R$ -dependent. The main  
12 substrate typically changed during the exercise test, from initially fat (RER  $\approx$   
13 0.7) to carbohydrate (RER  $\approx$  1.0). This pattern remained even in  $A_{2A}R$  KO mice.  
14 Caffeine and SCH-58261 also did not change exercise-induced tail heating, or  
15 thermogenesis. This effect of caffeine was been ruled out in exercising  
16 subjects<sup>8,9</sup>. Our data does not support the metabolic mechanisms of caffeine for  
17 its ergogenic effects.

18 Caffeine is lipophilic, easily crosses blood-brain barrier and reaches CNS  
19 20-50  $\mu$ M levels after 1-3 cups of coffee<sup>9</sup>, sufficient to antagonize  $A_1R$  and  
20  $A_{2A}R$ . Caffeine is psychostimulant<sup>9,19,20</sup> and decreases the rate of perceived  
21 exertion (RPE) during exercise<sup>5,8,17</sup>, which opens the central fatigue hypothesis  
22 of caffeine also for its ergogenic effects. Here, caffeine was not psychostimulant  
23 and ergogenic in fb- $A_{2A}R$  KO mice. There are two other pharmacological  
24 studies in this same line of evidence. The intracerebroventricular injection of  
25 caffeine (200  $\mu$ g) was ergogenic in rats<sup>4</sup>, and the nonselective adenosine

1 receptor agonist, 5'-(N-Ethylcarboxamido)adenosine (NECA) defeat this effect<sup>4</sup>.  
2 In a reverse experimental design, Zheng & Hasegawa<sup>2</sup> showed that systemic  
3 caffeine reversed the poor running performance of NECA-treated rats. Highlight  
4 for the non-selective mechanism of NECA, in contrast to highly selectivity of  
5 SCH-58261 by A<sub>2A</sub>R. Our data reinforce the ergogenic role of A<sub>2A</sub>R antagonism  
6 in the CNS, which shows similarities to psychostimulant effects of caffeine and  
7 SCH-58261. The psychostimulant effects of caffeine depend on dopaminergic  
8 signaling. As for its less investigated ergogenic effect, caffeine increases  
9 extracellular levels of dopamine in the cerebrospinal fluid of running rats<sup>2</sup>.  
10 Caffeine is also a negative allosteric modulator of D<sub>2</sub> receptors of A<sub>2A</sub>R-D<sub>2</sub>R G-  
11 protein coupled receptor (GPCR) heteromers in the basal ganglia<sup>10,11</sup>. Selective  
12 A<sub>2A</sub>R antagonists improve dopaminergic signaling through increased availability  
13 of D<sub>2</sub>/D<sub>3</sub> receptors<sup>11</sup>, causing wakefulness and psychostimulation. Caffeine,  
14 methylphenidate (dopamine and norepinephrine reuptake inhibitor) and  
15 reboxetine (selective noradrenaline reuptake inhibitor) are ergogenic<sup>12-14</sup> and  
16 reduce saccade eye fatigue after exercise, a marker of central fatigue<sup>14,15</sup>.  
17 Caffeine also reduces central fatigue induced by transcranial magnetic  
18 stimulation (TMS)<sup>16</sup>. In summary, our data supports the well-set role of neuronal  
19 A<sub>2A</sub>R for ergogenic effects of caffeine.

20

## 21 **METHODS**

### 22 **Animal colony and drugs**

23 The animals used were male (23.9 ± 0.4 g, 8-10 weeks old) and female mice  
24 (20 ± 0.2 g, 8-10 weeks old) from our global-A<sub>2A</sub>R knock-out (KO) mice (A<sub>2A</sub>R  
25 KO)<sup>17</sup> and forebrain-A<sub>2A</sub>R KO (fb-A<sub>2A</sub>R KO)<sup>18</sup> inbred colony and wildtype (WT)

1 littermates. Cre-LoxP method generate fb-A<sub>2A</sub>R KO<sup>18</sup>. The generation and  
2 genotyping of A<sub>2A</sub>R KO and fb-A<sub>2A</sub>R KO mice were previously described<sup>17,18</sup>.

3 Mice were housed in HEPA-filtered ventilated racks and collective cages  
4 (n = 3-5) under controlled environment (12 h light-dark cycle, lights on at 7:00  
5 AM, and room temperature of 21 ± 1°C) with *ad libitum* access to food and  
6 water. Housing and handling were performed according to European Union  
7 guidelines. The study was approved by the Ethical Committee of the Center for  
8 Neuroscience and Cell Biology (University of Coimbra).

9 Experimental design is shown in Fig.S2. The animals were habituated to  
10 handling, injections (0.9% NaCl – saline, i.p.) and treadmill for 3 days. SCH-  
11 58261 (1 mg/kg, i.p., dissolved in 10% DMSO in 0.9% NaCl – saline) and  
12 caffeine (15 mg/kg, i.p., dissolved in saline) were freshly prepared and  
13 administered systemically (volume 10 ml/kg body weight) on days 4 and 5, 15  
14 minutes before open field (4<sup>th</sup> day) and ergospirometry (5<sup>th</sup> day). All behavioral  
15 tests and drug treatments were carried out between 9:00 and 17:00 hours in a  
16 sound-attenuated and temperature/humidity controlled room (20.3±0.6 °C,  
17 62.8±0.4 %H<sub>2</sub>O) under low-intensity light (≈ 10 lux). Open field and treadmill  
18 were cleaned with 10% EtOH between individual experiments. Allocation to the  
19 experimental groups was random. For each test, the experimental unit was an  
20 individual animal.

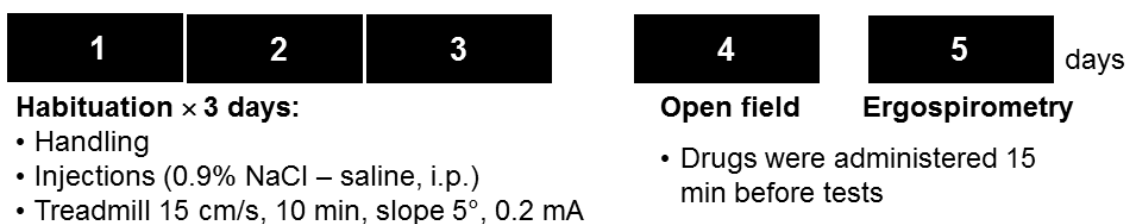

1 **Open field**

2 The exploration of an open field (38 × 38 cm) was analyzed for 15 min using the  
3 ANY-maze™ video tracking system (Stoelting Co.).

4

5 **Ergospirometry**

6 Mice were accustomed with a single-lane treadmill (Panlab LE8710, Harvard  
7 apparatus) at speed 15 cm/s (10 min, slope 5°, 0.2 mA) with 24 h interval  
8 between each habituation session (Fig.S2). The incremental running protocol  
9 started at 15 cm/s with an increment of 5 cm/s every 2 min at 5° inclination. The  
10 exercise lasted until running exhaustion, defined by the inability of the animal to  
11 leave the electrical grid for 5 seconds<sup>1,19,20</sup>. We estimated the power output for  
12 treadmill running based on a standard conversion of the vertical work, body  
13 weight and running speed<sup>1,21,22</sup>.

14 Oxygen uptake ( $\dot{V}O_2$ ) and carbon dioxide production ( $\dot{V}CO_2$ ) were  
15 estimated in a metabolic chamber (Gas Analyzer ML206, 23 × 5 × 5 cm, AD  
16 Instruments, Harvard) coupled to treadmill. The animals remained in the  
17 chamber for 15 min prior to exercise testing. Atmospheric air ( $\approx 21\%$  O<sub>2</sub>,  $\approx 0.03\%$   
18 CO<sub>2</sub>) was renewed at a rate 120 mL/min, using the same sampling rate for the  
19 LASER oxygen sensor (Oxigraf X2004, resolution 0.01%) and infrared carbon  
20 dioxide sensor (Servomex Model 15050, resolution 0.1%).

21

## 1 **Vaginal cytology**

2 We evaluated the estrous cycle immediately after the exercise test, through 4-5  
3 consecutive vaginal lavages (with 40-50  $\mu$ L of distilled H<sub>2</sub>O) then mounted on  
4 gelatinized slides (76 x 26 mm)<sup>23,24</sup>. These procedures lasted no more than 3-5  
5 minutes, and there were no major temporal delays between behavioral  
6 experiments and fluid collection for vaginal cytology<sup>1</sup>.

7 The vaginal smear were desiccated at room temperature and covered  
8 with 0.1% crystal violet for 1 min, then twice washed with 1 mL H<sub>2</sub>O and  
9 desiccated at room temperature. The slides were mounted with Eukitt medium  
10 (Sigma-Aldrich) and evaluated under an optical microscope at 1x, 5x and 20x  
11 (Zeiss Axio Imager 2). The characterization of the estrous cycle was performed  
12 according to literature<sup>23,24</sup>. Females were categorized for initial (metestrus) or  
13 late (diestrus) follicular phase, ovulation (proestrus), or luteal phase (estrus)

14

## 15 **Thermal imaging**

16 An infrared (IR) camera (FLiR C2, emissivity of 0.95, FLiR Systems) placed  
17 overtop (25 cm height) of a plastic tube (25 cm diameter) was used to acquire a  
18 static dorsal thermal image. IR images were taken immediately before and after  
19 exercise tests, namely at resting and recovery (Fig.2G), respectively. IR images  
20 were analyzed with FLiR Tools software (Flir, Boston)<sup>1,25</sup>.

21

1   **Statistics**

2   Data are presented as mean  $\pm$  Standard Error of the Mean (SEM). Data were  
3   evaluated through Student's t-test or Analysis of Variance (ANOVA), followed by  
4   the Bonferroni post-hoc test. The differences were considered significant when  
5   P < 0.05.

6

7   **Data Availability**

8   The datasets generated and analyzed during the current study are available  
9   from the corresponding author on reasonable request.

10

11   **REFERENCES**

- 12   1.    Aguiar, A.S., Jr., Speck, A.E., Amaral, I.M., Canas, P.M. & Cunha, R.A.  
13        The exercise sex gap and the impact of the estrous cycle on exercise  
14        performance in mice. *Sci Rep* **8**, 10742 (2018).
- 15   2.    Claghorn, G.C., Thompson, Z., Wi, K., Van, L. & Garland, T., Jr. Caffeine  
16        stimulates voluntary wheel running in mice without increasing aerobic  
17        capacity. *Physiol Behav* **170**, 133-140 (2017).
- 18   3.    Davis, J.M., *et al.* Central nervous system effects of caffeine and  
19        adenosine on fatigue. *Am J Physiol Regul Integr Comp Physiol* **284**,  
20        R399-404 (2003).
- 21   4.    Solano, A.F., Scheffer, D.L., Alves, A.C.B., Latini, A. & Aguiar Jr, A.S.  
22        Potential pitfalls when investigating the ergogenic effects of caffeine in  
23        mice. *J Syst Integr Neurosci* **3**, 4 (2017).

- 1 5. Zheng, X. & Hasegawa, H. Administration of caffeine inhibited adenosine  
2 receptor agonist-induced decreases in motor performance,  
3 thermoregulation, and brain neurotransmitter release in exercising rats.  
4 *Pharmacol Biochem Behav* **140**, 82-89 (2016).
- 5 6. Zheng, X., Takatsu, S., Wang, H. & Hasegawa, H. Acute intraperitoneal  
6 injection of caffeine improves endurance exercise performance in  
7 association with increasing brain dopamine release during exercise.  
8 *Pharmacol Biochem Behav* **122**, 136-143 (2014).
- 9 7. Bastia, E., *et al.* A crucial role for forebrain adenosine A(2A) receptors in  
10 amphetamine sensitization. *Neuropsychopharmacology* **30**, 891-900  
11 (2005).
- 12 8. Del Coso, J., Estevez, E. & Mora-Rodriguez, R. Caffeine during exercise  
13 in the heat: thermoregulation and fluid-electrolyte balance. *Med Sci*  
14 *Sports Exerc* **41**, 164-173 (2009).
- 15 9. Poehlman, E.T., *et al.* Influence of caffeine on the resting metabolic rate  
16 of exercise-trained and inactive subjects. *Med Sci Sports Exerc* **17**, 689-  
17 694 (1985).
- 18 10. Bonaventura, J., *et al.* Allosteric interactions between agonists and  
19 antagonists within the adenosine A2A receptor-dopamine D2 receptor  
20 heterotetramer. *Proc Natl Acad Sci U S A* **112**, E3609-3618 (2015).
- 21 11. Volkow, N.D., *et al.* Caffeine increases striatal dopamine D2/D3 receptor  
22 availability in the human brain. *Transl Psychiatry* **5**, e549 (2015).
- 23 12. Roelands, B., *et al.* The effects of acute dopamine reuptake inhibition on  
24 performance. *Med Sci Sports Exerc* **40**, 879-885 (2008).

- 1 13. Roelands, B., *et al.* A dopamine/noradrenaline reuptake inhibitor  
2 improves performance in the heat, but only at the maximum therapeutic  
3 dose. *Scand J Med Sci Sports* **22**, e93-98 (2012).
- 4 14. Connell, C.J.W., Thompson, B., Turuwhenua, J., Srzich, A. & Gant, N.  
5 Effects of Dopamine and Norepinephrine on Exercise-induced  
6 Oculomotor Fatigue. *Med Sci Sports Exerc* **49**, 1778-1788 (2017).
- 7 15. Connell, C.J., *et al.* Fatigue related impairments in oculomotor control are  
8 prevented by caffeine. *Sci Rep* **6**, 26614 (2016).
- 9 16. Kalmar, J.M. & Cafarelli, E. Central fatigue and transcranial magnetic  
10 stimulation: effect of caffeine and the confound of peripheral transmission  
11 failure. *J Neurosci Methods* **138**, 15-26 (2004).
- 12 17. Augusto, E., *et al.* Ecto-5'-nucleotidase (CD73)-mediated formation of  
13 adenosine is critical for the striatal adenosine A2A receptor functions. *J*  
14 *Neurosci* **33**, 11390-11399 (2013).
- 15 18. Shen, H.Y., *et al.* Adenosine A(2)A receptors in striatal glutamatergic  
16 terminals and GABAergic neurons oppositely modulate psychostimulant  
17 action and DARPP-32 phosphorylation. *PLoS One* **8**, e80902 (2013).
- 18 19. Ayachi, M., Niel, R., Momken, I., Billat, V.L. & Mille-Hamard, L. Validation  
19 of a Ramp Running Protocol for Determination of the True VO<sub>2</sub>max in  
20 Mice. *Front Physiol* **7**, 372 (2016).
- 21 20. Lee-Young, R.S., *et al.* Obesity impairs skeletal muscle AMPK signaling  
22 during exercise: role of AMPK $\alpha$ 2 in the regulation of exercise  
23 capacity in vivo. *Int J Obes (Lond)* **35**, 982-989 (2011).
- 24 21. Barbato, J.C., *et al.* Spectrum of aerobic endurance running performance  
25 in eleven inbred strains of rats. *J Appl Physiol (1985)* **85**, 530-536 (1998).



- 1 22. Workman, J.M. & Armstrong, B.W. Oxygen cost of treadmill walking. *J*  
2 *Appl Physiol* **18**, 798-803 (1963).
- 3 23. Caligioni, C.S. Assessing reproductive status/stages in mice. *Curr Protoc*  
4 *Neurosci* **Appendix 4**, Appendix 4I (2009).
- 5 24. McLean, A.C., Valenzuela, N., Fai, S. & Bennett, S.A. Performing vaginal  
6 lavage, crystal violet staining, and vaginal cytological evaluation for  
7 mouse estrous cycle staging identification. *J Vis Exp*, e4389 (2012).
- 8 25. Crane, J.D., Mottillo, E.P., Farncombe, T.H., Morrison, K.M. & Steinberg,  
9 G.R. A standardized infrared imaging technique that specifically detects  
10 UCP1-mediated thermogenesis in vivo. *Mol Metab* **3**, 490-494 (2014).

11

## 1 LEGENDS TO FIGURES

2 Fig.1 – Effect of caffeine (15 mg/kg, i.p.) and SCH-58261 (1 mg/kg, i.p.) on the  
3 basal locomotion and exercise performance of female mice (A). Caffeine was  
4 psychostimulant in the open field, but not in caffeine-treated  $A_{2A}R$  KO mice.  
5 Ergospirometry increased  $\dot{V}O_2$  (B),  $\dot{V}CO_2$  (E), RER (D) and running power (B)  
6 until the animals reached fatigue. Caffeine and SCH-58261 increased running  
7 power (C) and  $\dot{V}O_{2max}$  of WT (B), but not  $A_{2A}R$  KO. Resting tail temperature  
8 was not different (G). Exercise-induced tail hyperthermia was greater in WT  
9 than in  $A_{2A}R$  KO, with no caffeine or SCH-58261 effect. Infrared Fig.G'-G''  
10 illustrates the tails lighting up with the heat. Values are expressed as mean  $\pm$   
11 standard error of the mean (SEM). N = 8-9 animals/group for 12 independent  
12 experiments. \* P < 0.05 vs. saline for SCH-58261 (Student's t-test) or caffeine  
13 (ANOVA, Bonferroni post hoc test). # P < 0.05 vs. wt-caffeine (ANOVA,  
14 Bonferroni post hoc test).

15

16 Fig.2 – Effect of caffeine (15 mg/kg, i.p.) and SCH-58261 (1 mg/kg, i.p.) on the  
17 basal locomotion and exercise performance of male mice (A). Caffeine and  
18 SCH-58261 were psychostimulant in the open field, but not in caffeine-treated  
19 forebrain- $A_{2A}R$  KO mice. Ergospirometry increased  $\dot{V}O_2$  (B),  $\dot{V}CO_2$  (E), RER (D)  
20 and running power (B) until the animals reached fatigue. Caffeine and SCH-  
21 58261 increased running power (C) and  $\dot{V}O_{2max}$  of WT (B), but not forebrain-  
22  $A_{2A}R$  KO. Tail temperature was not different at resting and after exercise (G).  
23 Values are expressed as mean  $\pm$  standard error of the mean (SEM). N = 8-9  
24 animals/group for 12 independent experiments. \* P < 0.05 vs. saline for SCH-

- 1 58261 (Student's t-test) or caffeine (ANOVA, Bonferroni post hoc test). # P <
- 2 0.05 vs. wt-caffeine (ANOVA, Bonferroni post hoc test).

**A Diestrus**

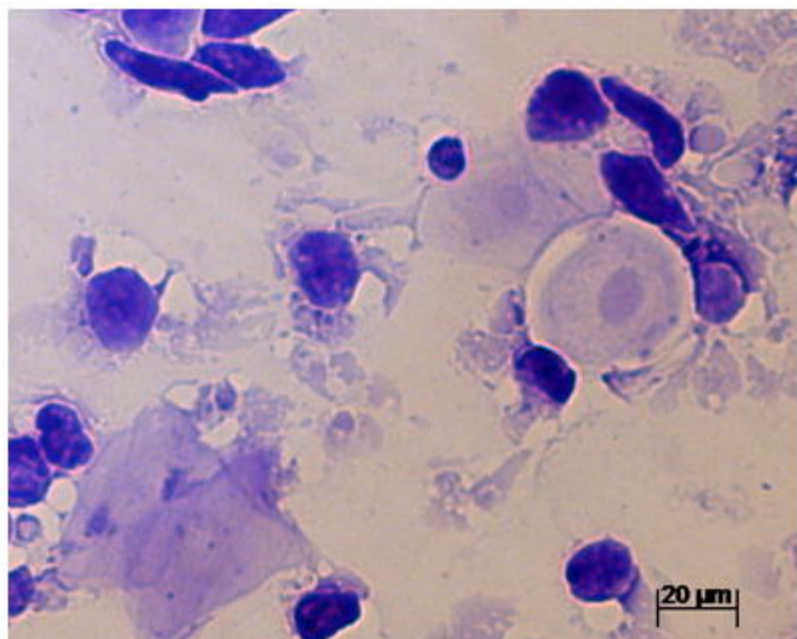

**B Proestrus**

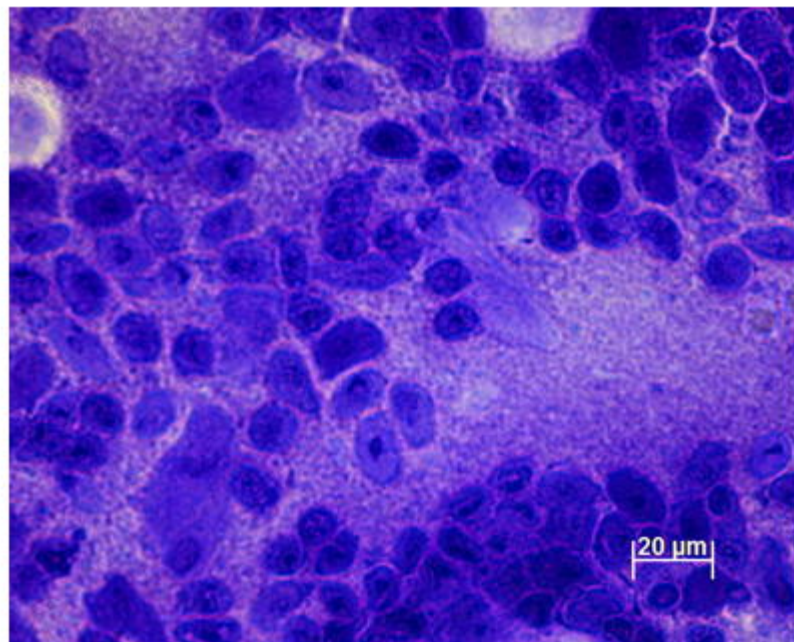

**C Estrus**

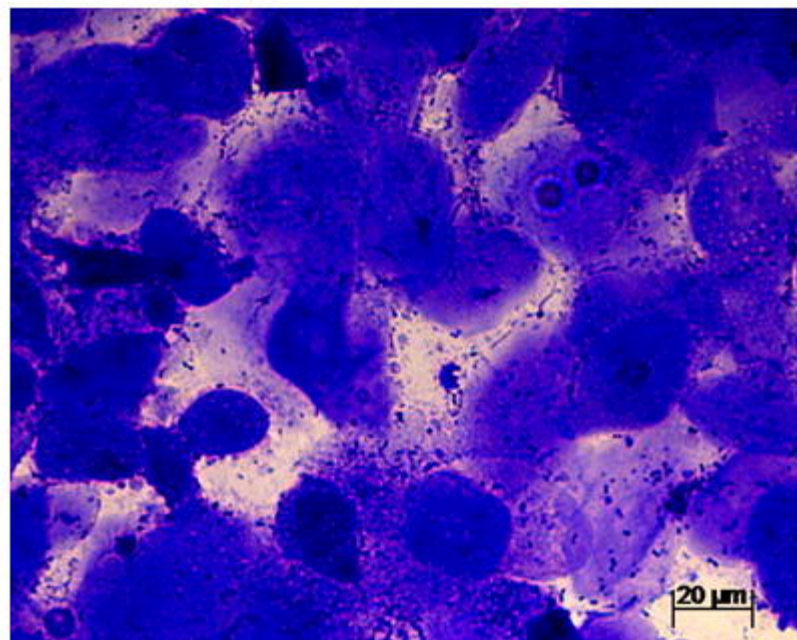

**D Metestrus**

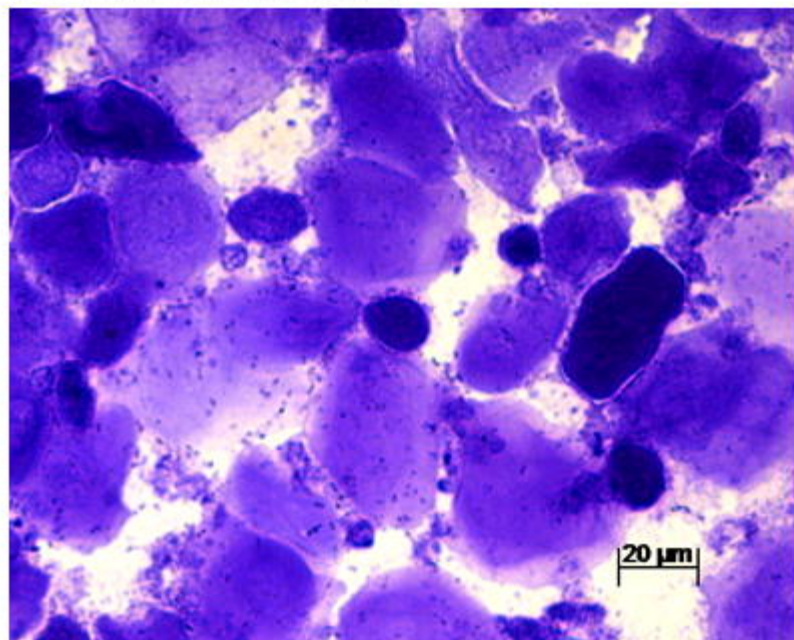

**1**

**2**

**3**

**4**

**5**

days

**Habituation × 3 days:**

- Handling
- Injections (0.9% NaCl – saline, i.p.)
- Treadmill 15 cm/s, 10 min, slope 5°, 0.2 mA

**Open field**

- Drugs were administered 15 min before tests

**Ergospirometry**

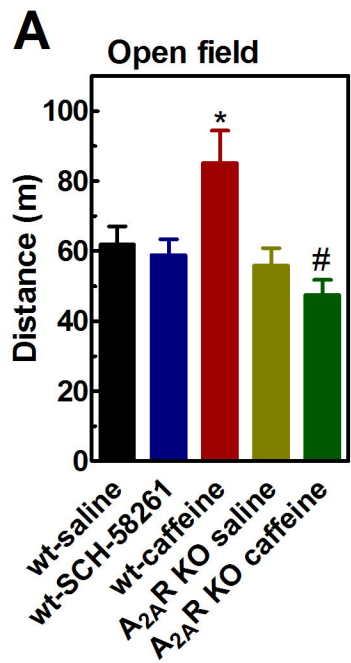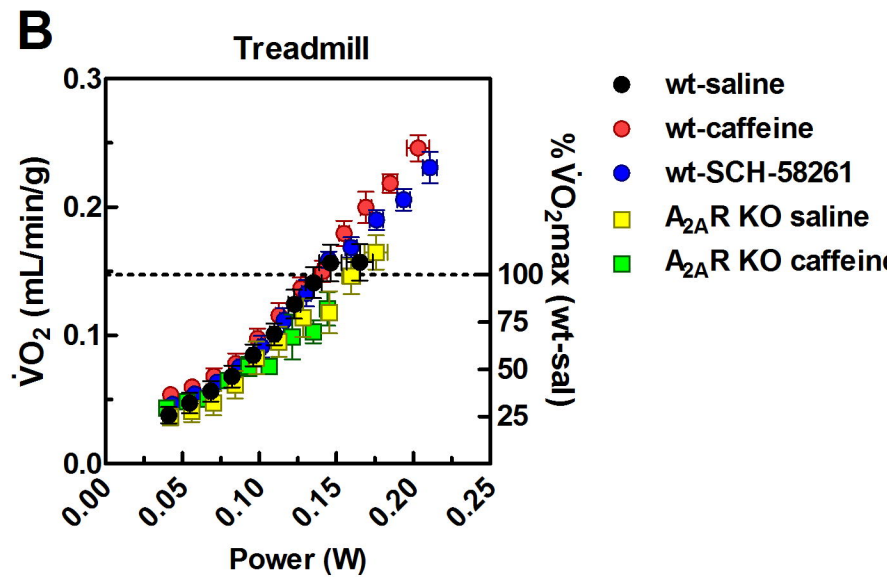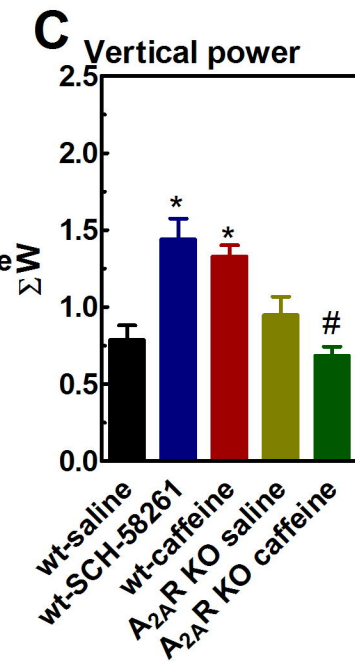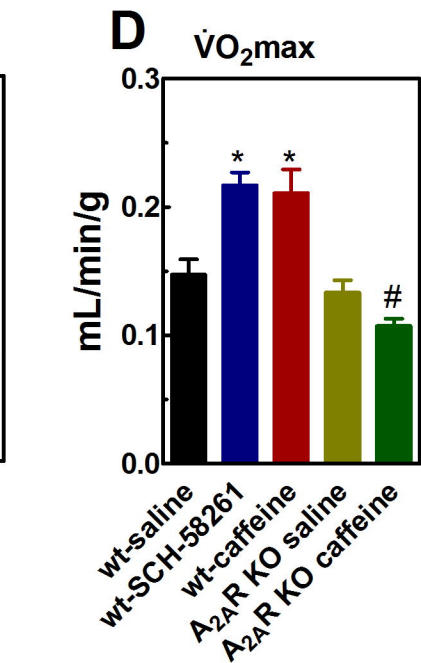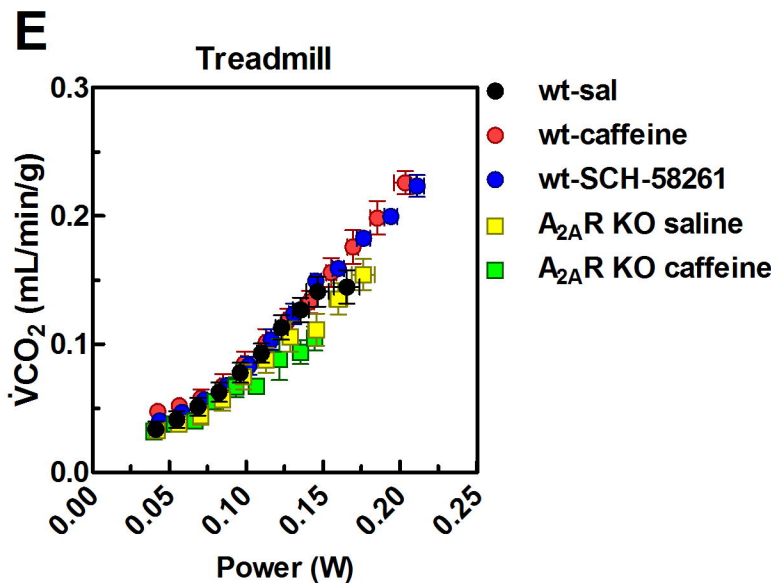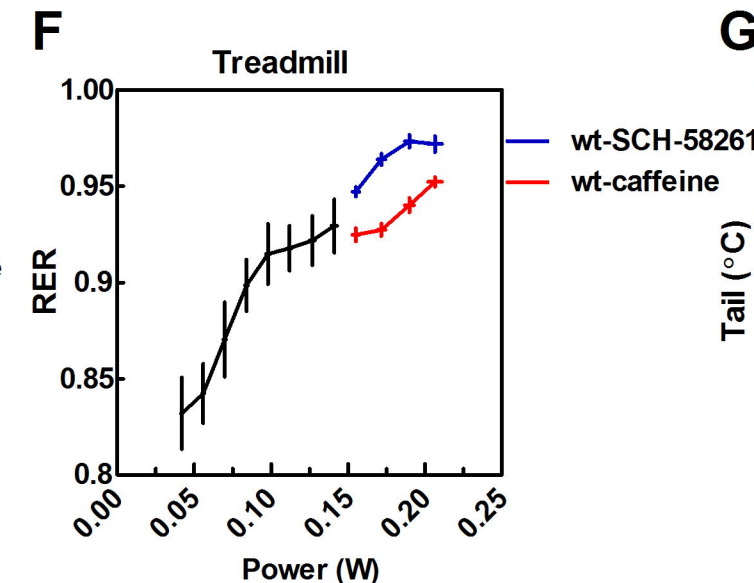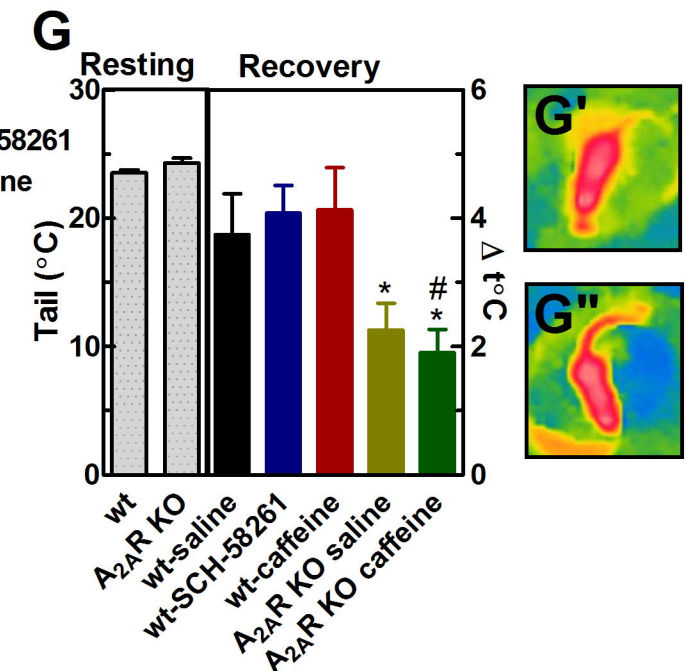

**A** Open field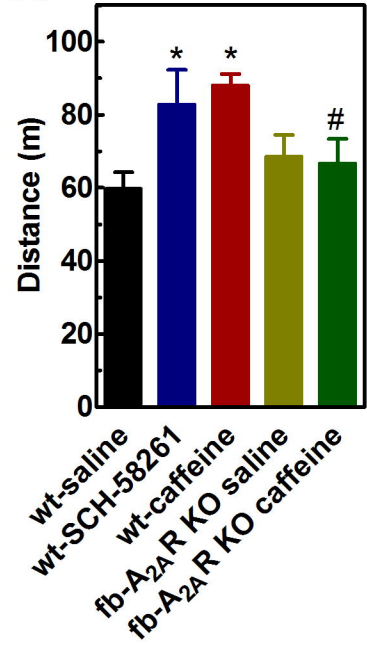**B** Treadmill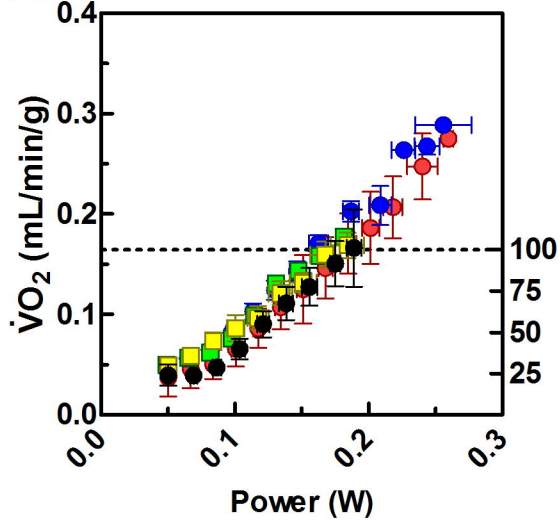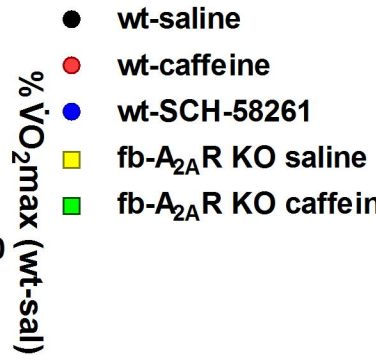**C** Running power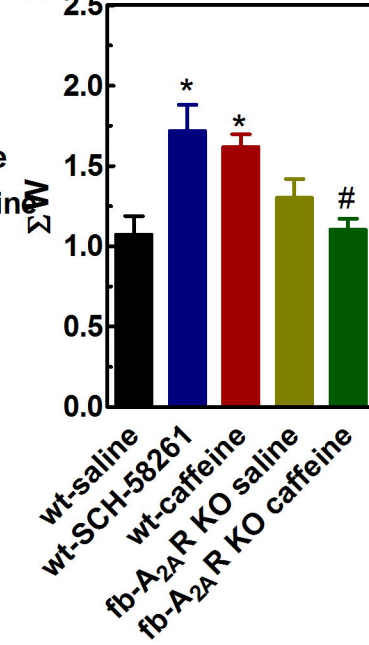**D**  $\dot{V}O_2$ max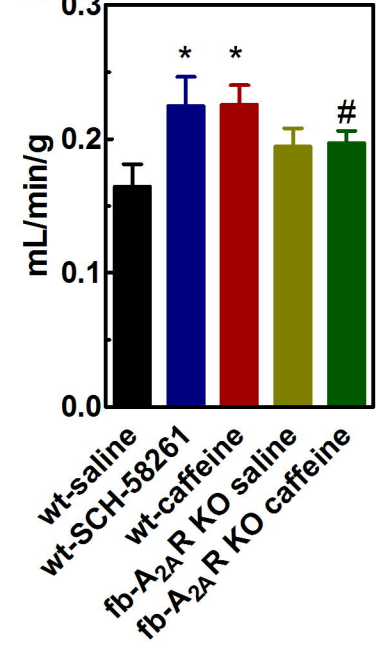**E** Treadmill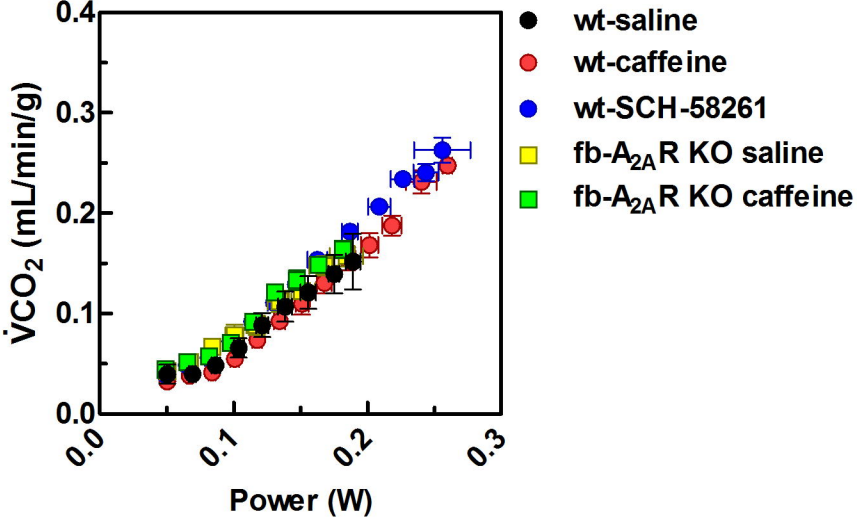**F** Treadmill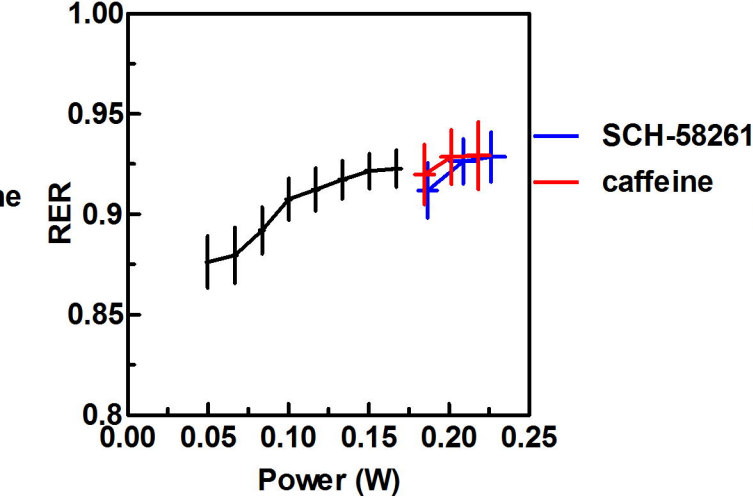**G** Resting Recovery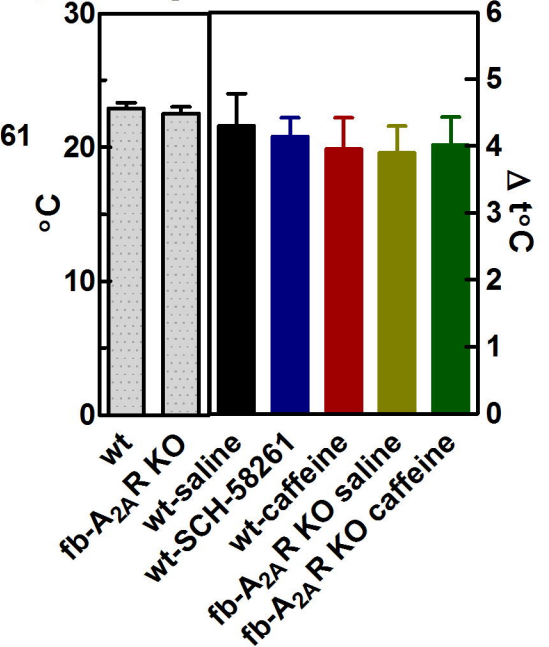

Source: https://www.biorxiv.org/content/biorxiv/early/2020/04/03/2020.04.02.021923.full.pdf
